# Supplementary material for: Stochastic Model of Integrin-Mediated Signaling and Adhesion Dynamics at the Leading Edges of Migrating Cells
Source: PLOS journal article supplement (doi:10.1371/journal.pcbi.1000688), 2010-02-26
Supplement: S6 (10.1371/journal.pcbi.1000688.s006) [file journal.pcbi.1000688.s006]

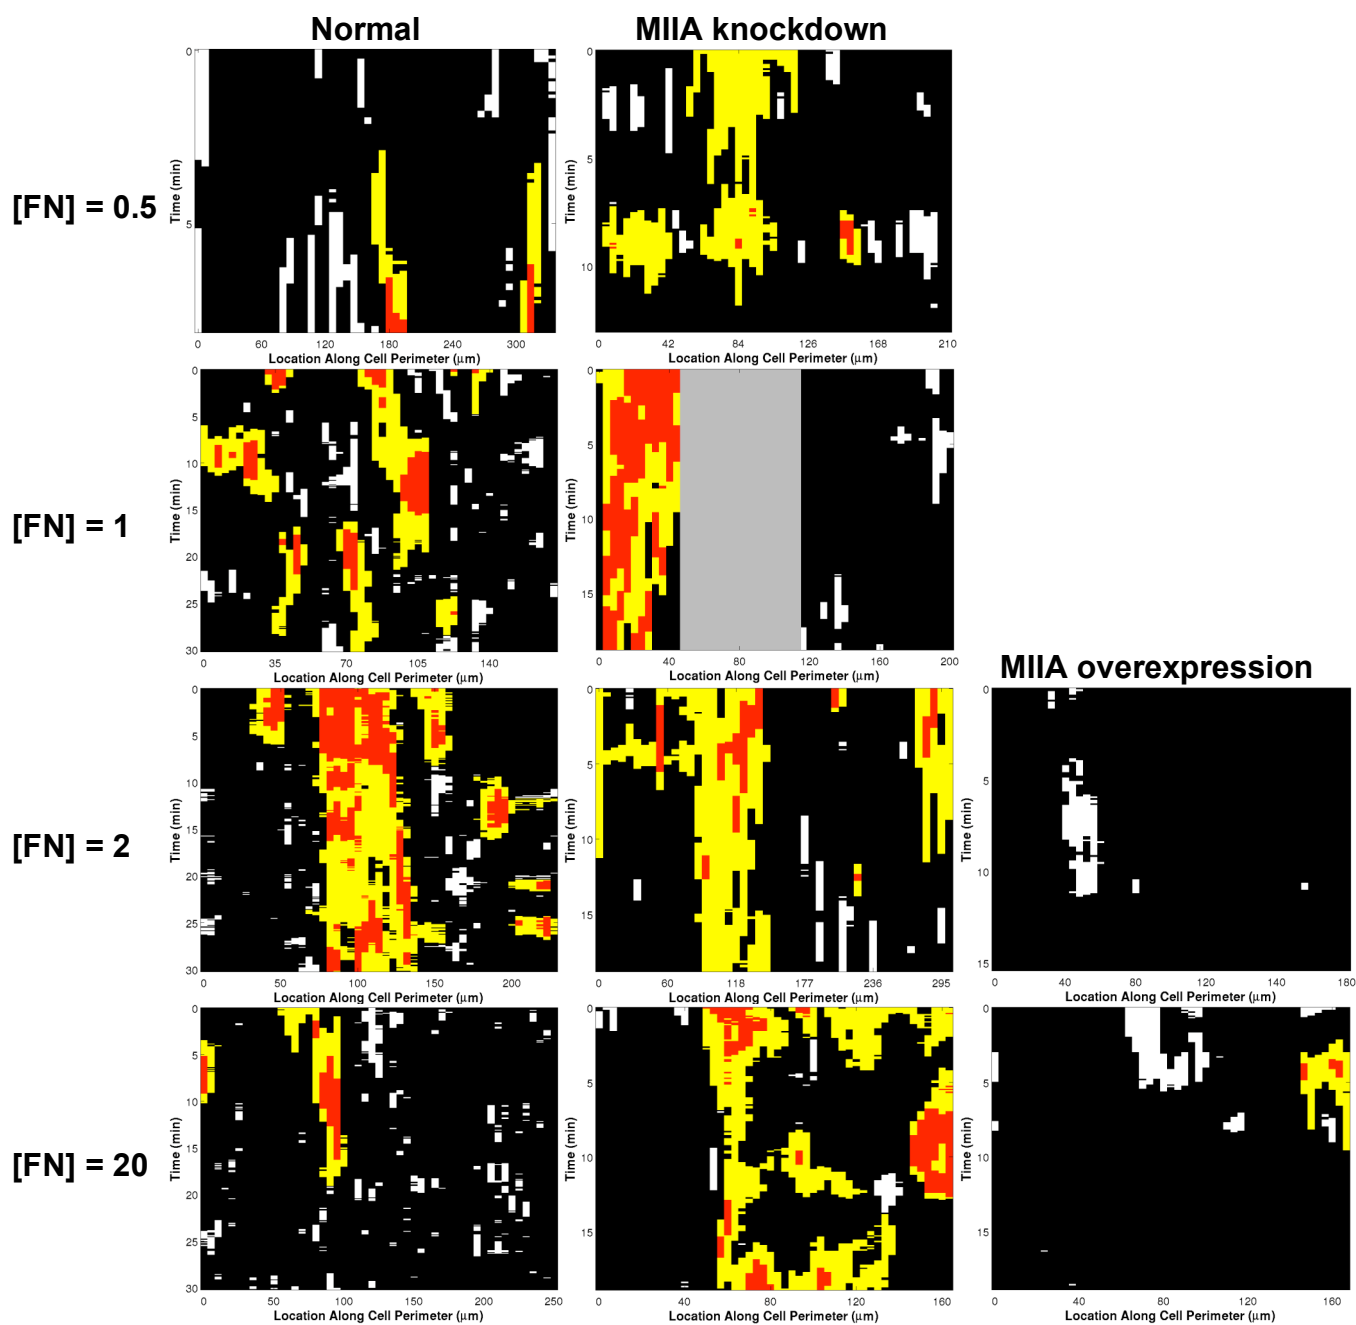

Figure S4. The velocity maps in Fig. 7 are shown in segmented form here. Red regions: velocity (nm/s)  $> 5.0$ ; yellow regions:  $1.0 < \text{velocity (nm/s)} < 5.0$  and contacting a red region; white regions:  $1.0 < \text{velocity (nm/s)} < 5.0$  but not contacting a red region; black regions: velocity (nm/s)  $< 1.0$ . The contiguous red/yellow regions are considered *bona fide* protrusions.
